# Supplementary material for: The cysteinyl leukotriene 2 receptor contributes to all-trans retinoic acid-induced differentiation of colon cancer cells
Source: PubMed Central journal article supplement (PMC3710469; doi:10.1186/1471-2407-13-336), 2013-07-08

**Figure S1 – No effect on activity after mutation or truncation of putative RARE sites on CysLT<sub>2</sub>R promoter.**

A pGL3-Enhancer vector (Promega, Madison, WI) with a luciferase reporter gene containing one thousand base pairs upstream the transcription start site (-1 to -1012) of the *CysLTR2* gene was used as a control and template for mutations of the putative RARE sites. The mutations were carried out using QuikChange XL and Multi Site-Directed Mutagenesis kits (Agilent Technologies, La Jolla, CA) with the following primers (RAREs underlined and mutations in bold).

Forward 1:

5'-CATGTTGGCCAGACTGGTCTAAAACTCCAAACCTCAGGTGATCTGC-3',

Forward 2:

5'-GGTATTCATGTCAACAGGGTATGTAGGTATCAAGTTCTCTAAGTTTGAAGCGTC-3',

Reverse 1:

5'-GCAGATCACCTGAGGTTTGGAGTTTTAGACCAGTCTGGCCAACATG-3', and

Reverse 2:

5'-AAACTTAGAGAACTTGATACCTACATACCCTGTTGACATGAATAC-3'.

We also used truncated forms of the same vector with the sequences from -1 to -187 (IRF\*), from -1 to -412 (+IRF) base pairs upstream transcription start site, and from -412 to -1012 (-IRF), that contained no RARE, first or second RARE only, respectively, published earlier [1].

1. Magnusson C, Bengtsson AM, Liu M, Liu J, Ceder Y, Ehrnstrom R, Sjolander A: **Regulation of cysteinyl leukotriene receptor 2 expression--a potential anti-tumor mechanism.** *PloS one* 2011, **6**(12):e29060.

**Sequence upstream (1012 bp) from the transcription start site for the *CYSLTR2* gene with the putative retinoic acid response elements, RAREs, underlined**

GTTTCAAACATTAAATGTAAGTCTAGACTCTAAAAGGGAAGGACAGCCTATTGTATTTACACA  
TATTTTGGCTTACCATGTTCTTTCTTATTTTCTAATATTCTAAGTTTCCTTCTTTTATAAATTCC  
TTTCTGTTTAGAGAACTTCTTTAGTCATTCTTTGTTTGTTTGTGTTTTTGTGTTTTGTTTGTGTT  
GTTTTTTTTTTTTTTGAGATGGAGTTTCGCTCTTGTTGCCCCAGCTGGAGTGCAATGGCATGAT  
CTCGGCTCATTGCAACTTCTGCCTCCCAGGTTTCAGGCAATTCTCCTGCCTCAGCCTCCCGGGT  
AGCAGAGGTGACAGGTGCCTGCCACTGGGCCCGCTAATTTTTGTATTTTTAGTAGAGACGGAG  
TTTCACCATGTTGGCCAGACTGGTCTTGAACTCCTGACCTCAGGTGATCTGCCAGCCTCAGC  
TTCCCAAAGTCTGGGATTACGGGCGTGAGCCACCAAACCCAGCCTAGTCATTCTTTAAGAT  
AGGTCTGCTGGCAGCAAAGTCTTAGTTTTCCGTCTGAAAAGTCTTGATTTTTCTCTTTGACT  
TGAAGGATTTTTTGCTGGACATAGAATACTAGTTTGGCAGGTCTTTTCTTTCAGCATTGAG  
AAATGTGCCATTTCTTTCTGTCCTCCATAGTTTCTGATGAGAAATCTGCTATTCAGTAGTTTTA  
GGCTGCAATATCATAGTAAGGTATTCATGTCAACAGGGTCAGTAGGTCACAAGTTCTCTAAG  
TTTGAAGCGTCAGCTTCAACCAAACAAATTAATGGCTATTCTACATTCAAAAATCAGGAAATT  
TAAATTTATTATGAAATGTAATGCAGCATGTAGTAAAGACTTAACCAGTGTTTTAAACTCAA  
CTTTCAAAGAAAAGATAGTATTGCTCCCTGTTTCATTAAAACCTAGAGAGATGTAATCAGTAA  
GCAAGAAGGAAAAAGGGAAATTCACAAAGTAACTTTTTGTGTCTGTTTCTTTTAAACCAGC

### Truncations of CysLT<sub>2</sub>R promoter

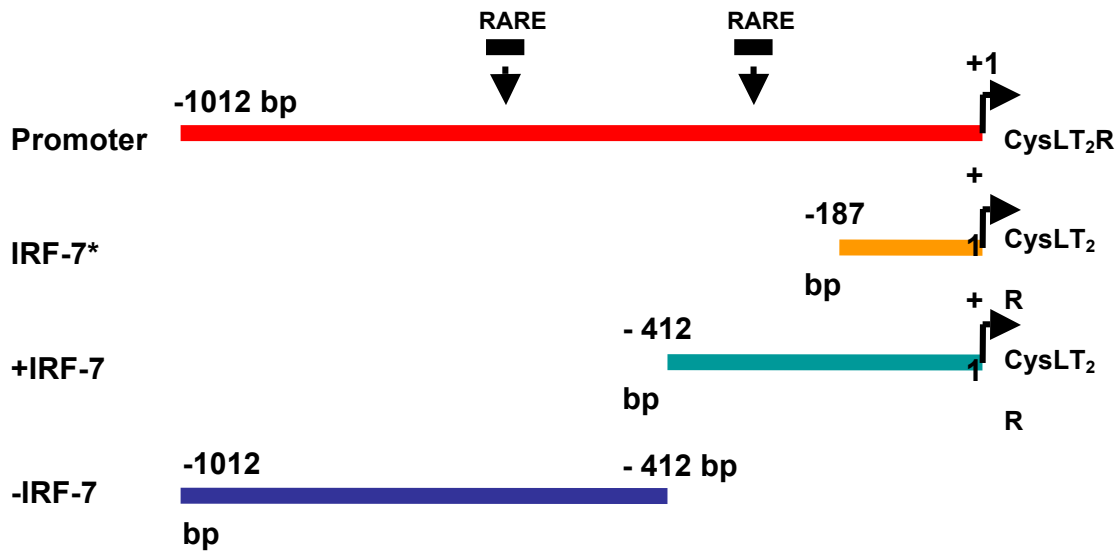

(A and B) Luciferase activity of cells transfected with plasmids with mutated RARE sites (first, second or both, respectively), or with truncated inserts. Stimulation with 10  $\mu$ M ATRA for 48 h shows no change in the increase in promoter activity compared to the unstimulated plasmid. These results indicate that the effect of ATRA is indirect.

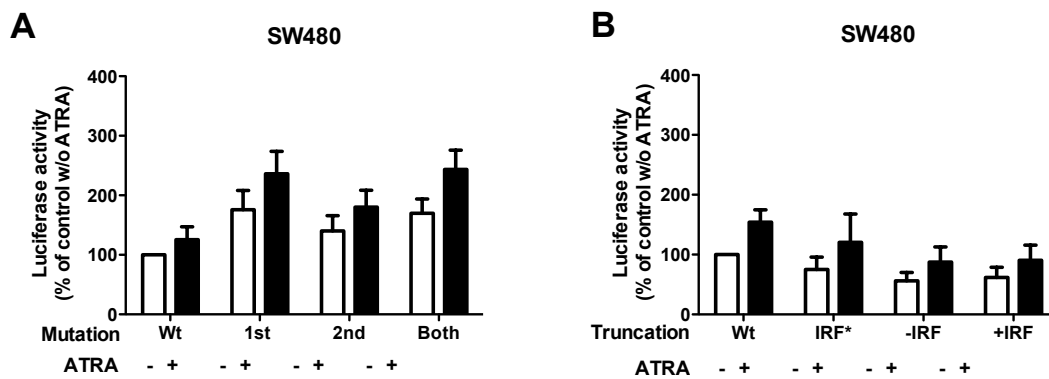

Supplement: 1471-2407-13-336-S1.pdf [file 1471-2407-13-336-S1.pdf]
